# Supplementary material for: Automated treatment planning of prostate stereotactic body radiotherapy with focal boosting on a fast‐rotating O‐ring linac: Plan quality comparison with C‐arm linacs
Source: PubMed Central journal article supplement (PMC8425873; doi:10.1002/acm2.13345), 2021-07-28
Supplement: ACM2-22-59-s001.pdf [file ACM2-22-59-s001.pdf]

## Supplemental Data

### RATING score sheet

| RATING score sheet                                    |                                                                                                                                                                                          | Points | Applicable/<br>relevant             | Answer<br>yes                       |
|-------------------------------------------------------|------------------------------------------------------------------------------------------------------------------------------------------------------------------------------------------|--------|-------------------------------------|-------------------------------------|
| <b>Questions for the Introduction</b>                 |                                                                                                                                                                                          |        |                                     |                                     |
| <i>The study aim formulated by research questions</i> |                                                                                                                                                                                          |        |                                     |                                     |
| 1                                                     | Does the study have a concise and precise study aim, defined with a restricted number of interconnected questions?                                                                       | 10     |                                     | <input checked="" type="checkbox"/> |
| <i>The motivation for the research questions</i>      |                                                                                                                                                                                          |        |                                     |                                     |
| 2                                                     | Has relevant up to date literature been included to support the need for the current study?                                                                                              | 5      |                                     | <input checked="" type="checkbox"/> |
| 3                                                     | Does the study address an existing knowledge gap?                                                                                                                                        | 10     |                                     | <input checked="" type="checkbox"/> |
| <b>Questions for Materials and Methods</b>            |                                                                                                                                                                                          |        |                                     |                                     |
| 4                                                     | Is the global study design adequate for answering the posed research questions?                                                                                                          | 10     |                                     | <input checked="" type="checkbox"/> |
| 5                                                     | Is the global study design described in sufficient detail for others to interpret and reproduce the results?                                                                             | 5      |                                     | <input checked="" type="checkbox"/> |
| <i>Patient cohort</i>                                 |                                                                                                                                                                                          |        |                                     |                                     |
| 6                                                     | Are the inclusion and exclusion criteria of the patient cohort described?                                                                                                                | 1      | <input checked="" type="checkbox"/> | <input checked="" type="checkbox"/> |
| 7                                                     | Is the clinical patient information of the cohort presented, including disease type, site(s) and clinical staging?                                                                       | 1      | <input checked="" type="checkbox"/> | <input checked="" type="checkbox"/> |
| 8                                                     | Is the included number of patients stated, explained and justified?                                                                                                                      | 1      | <input checked="" type="checkbox"/> | <input type="checkbox"/>            |
| 9                                                     | Has there been consideration of the need for ethical and/or legal approval for the study and if needed, is there a statement about this?                                                 | 5      |                                     | <input type="checkbox"/>            |
| <i>Imaging procedures</i>                             |                                                                                                                                                                                          |        |                                     |                                     |
| 10                                                    | Have the scanning parameters been reported in sufficient detail (image modalities, equipment model, slice thickness, voxel size, patient position (e.g. head first, supine, etc.) etc.)? | 1      | <input checked="" type="checkbox"/> | <input checked="" type="checkbox"/> |
| 11                                                    | Has the applied immobilisation equipment been described, (e.g. vendor and type, standard settings, etc.) where relevant?                                                                 | 1      | <input checked="" type="checkbox"/> | <input checked="" type="checkbox"/> |
| <i>Treatment machine and settings</i>                 |                                                                                                                                                                                          |        |                                     |                                     |
| 12                                                    | Have the treatment machine and relevant parameters been described with sufficient detail (model, beam energy, MLC, etc.)?                                                                | 1      | <input checked="" type="checkbox"/> | <input checked="" type="checkbox"/> |
| 13                                                    | Have the monitor unit reference conditions been defined, where relevant?                                                                                                                 | 1      | <input checked="" type="checkbox"/> | <input checked="" type="checkbox"/> |
| <i>Definition of targets and OARs</i>                 |                                                                                                                                                                                          |        |                                     |                                     |
| 14                                                    | Has GTV definition been described in sufficient detail, with references if possible?                                                                                                     | 1      | <input checked="" type="checkbox"/> | <input checked="" type="checkbox"/> |
| 15                                                    | Has CTV definition been described in sufficient detail, with references if possible?                                                                                                     | 1      | <input checked="" type="checkbox"/> | <input checked="" type="checkbox"/> |
| 16                                                    | Has the establishment of PTVs (or alternatively robustness settings) been described in sufficient detail?                                                                                | 1      | <input checked="" type="checkbox"/> | <input checked="" type="checkbox"/> |
| 17                                                    | Have PTV sizes in the patient cohort been described?                                                                                                                                     | 1      | <input checked="" type="checkbox"/> | <input checked="" type="checkbox"/> |
| 18                                                    | Have OAR definitions been described in sufficient detail, with references if possible?                                                                                                   | 1      | <input checked="" type="checkbox"/> | <input checked="" type="checkbox"/> |
| 19                                                    | Have PRV margins been described in sufficient detail, with references if available?                                                                                                      | 1      | <input checked="" type="checkbox"/> | <input checked="" type="checkbox"/> |

*Treatment planning system and dose calculation*

|    |                                                                                                                        |   |                                     |                                     |
|----|------------------------------------------------------------------------------------------------------------------------|---|-------------------------------------|-------------------------------------|
| 20 | Have all applied dose calculation algorithms been described in sufficient detail?                                      | 1 | <input checked="" type="checkbox"/> | <input checked="" type="checkbox"/> |
| 21 | For any commercial software used, have the manufacturer, algorithms and specific versions been stated?                 | 1 | <input checked="" type="checkbox"/> | <input checked="" type="checkbox"/> |
| 22 | Have all relevant user parameters and settings in the TPS been reported, e.g. beams, dose grid, control point spacing? | 1 | <input checked="" type="checkbox"/> | <input checked="" type="checkbox"/> |
| 23 | Have all volumes been evaluated with the same software/methodology?                                                    | 1 | <input checked="" type="checkbox"/> | <input checked="" type="checkbox"/> |

*Planning aims and optimisation*

|    |                                                                                                                                    |    |                                     |                                     |
|----|------------------------------------------------------------------------------------------------------------------------------------|----|-------------------------------------|-------------------------------------|
| 24 | Are clear planning aims defined, including imposed hard constraints and planning objectives (with or without soft constraints)?    | 5  |                                     | <input checked="" type="checkbox"/> |
| 25 | Has the ranking of planning objectives (priorities) been described?                                                                | 5  |                                     | <input checked="" type="checkbox"/> |
| 26 | Is the dose prescription clearly defined?                                                                                          | 10 |                                     | <input checked="" type="checkbox"/> |
| 27 | Is there a narrative description of the applied optimisation process, including the handling of all objectives with their ranking? | 5  |                                     | <input checked="" type="checkbox"/> |
| 28 | If manual intervention during or after optimisation is allowed, has this been described?                                           | 1  | <input checked="" type="checkbox"/> | <input checked="" type="checkbox"/> |

*Bias mitigation*

|    |                                                                                      |    |  |                                     |
|----|--------------------------------------------------------------------------------------|----|--|-------------------------------------|
| 29 | Have enough study details been provided such that bias issues could be noted?        | 5  |  | <input checked="" type="checkbox"/> |
| 30 | Has bias been sufficiently mitigated to reliably answer the posed research question? | 10 |  | <input checked="" type="checkbox"/> |

*Plan acceptability – minor and major protocol deviations*

|    |                                                                                         |   |                                     |                                     |
|----|-----------------------------------------------------------------------------------------|---|-------------------------------------|-------------------------------------|
| 31 | Was the procedure for assessment of plan acceptability well-described?                  | 1 | <input checked="" type="checkbox"/> | <input checked="" type="checkbox"/> |
| 32 | Was the procedure for assessment of minor and major protocol deviations well described? | 1 | <input checked="" type="checkbox"/> | <input type="checkbox"/>            |

*Plan (re-)normalisation for plan comparisons*

|    |                                                          |   |                                     |                                     |
|----|----------------------------------------------------------|---|-------------------------------------|-------------------------------------|
| 33 | Has plan (re-)normalisation been described sufficiently? | 1 | <input checked="" type="checkbox"/> | <input checked="" type="checkbox"/> |
|----|----------------------------------------------------------|---|-------------------------------------|-------------------------------------|

*Dose-volume parameters for plan evaluation and comparison*

|    |                                                                                                        |   |  |                                     |
|----|--------------------------------------------------------------------------------------------------------|---|--|-------------------------------------|
| 34 | Have sufficiently comprehensive dose-volume parameters been used for plan evaluations and comparisons? | 5 |  | <input checked="" type="checkbox"/> |
|----|--------------------------------------------------------------------------------------------------------|---|--|-------------------------------------|

*Population-mean DVHs*

|    |                                                                           |   |                          |                          |
|----|---------------------------------------------------------------------------|---|--------------------------|--------------------------|
| 35 | Has the algorithm for creating population-mean/median DVHs been reported? | 1 | <input type="checkbox"/> | <input type="checkbox"/> |
| 36 | Have the definitions of confidence intervals been included?               | 1 | <input type="checkbox"/> | <input type="checkbox"/> |

*Plan evaluations by clinicians*

|    |                                                 |   |                                     |                          |
|----|-------------------------------------------------|---|-------------------------------------|--------------------------|
| 37 | Have clinicians scored plans to assess quality? | 1 | <input checked="" type="checkbox"/> | <input type="checkbox"/> |
| 38 | Were plan comparisons by clinicians blinded?    | 1 | <input checked="" type="checkbox"/> | <input type="checkbox"/> |

*Predicted tumour control probability and normal tissue complication probabilities for plan evaluation and comparison*

|    |                                                             |   |                                     |                                     |
|----|-------------------------------------------------------------|---|-------------------------------------|-------------------------------------|
| 39 | Have any applied TCP models been described and referenced?  | 1 | <input type="checkbox"/>            | <input type="checkbox"/>            |
| 40 | Have any applied NTCP models been described and referenced? | 1 | <input checked="" type="checkbox"/> | <input checked="" type="checkbox"/> |

*Plan deliverability and complexity*

|    |                                                                                                     |   |                                     |                                     |
|----|-----------------------------------------------------------------------------------------------------|---|-------------------------------------|-------------------------------------|
| 41 | Have methods used to assess plan deliverability and complexity been described in sufficient detail? | 1 | <input checked="" type="checkbox"/> | <input checked="" type="checkbox"/> |
|----|-----------------------------------------------------------------------------------------------------|---|-------------------------------------|-------------------------------------|

| <i>Composite plan quality metrics</i>                                     |                                                                                                                                                                                                                       |    |                                     |                                     |
|---------------------------------------------------------------------------|-----------------------------------------------------------------------------------------------------------------------------------------------------------------------------------------------------------------------|----|-------------------------------------|-------------------------------------|
| 42                                                                        | Is there a sufficient basis (e.g. in the literature) for any selected composite plan quality metrics?                                                                                                                 | 1  | <input type="checkbox"/>            | <input type="checkbox"/>            |
| 43                                                                        | Is there an adequate description of the calculation of the composite plan quality metrics?                                                                                                                            | 1  | <input type="checkbox"/>            | <input type="checkbox"/>            |
| <i>Planning and delivery times</i>                                        |                                                                                                                                                                                                                       |    |                                     |                                     |
| 44                                                                        | Has measurement of planning times been described in sufficient detail?                                                                                                                                                | 1  | <input checked="" type="checkbox"/> | <input type="checkbox"/>            |
| 45                                                                        | Has the establishment of delivery times been described in sufficient detail?                                                                                                                                          | 1  | <input checked="" type="checkbox"/> | <input checked="" type="checkbox"/> |
| <i>Statistical analysis</i>                                               |                                                                                                                                                                                                                       |    |                                     |                                     |
| 46                                                                        | Have proper statistical methods been used and described in sufficient detail?                                                                                                                                         | 5  |                                     | <input checked="" type="checkbox"/> |
| 47                                                                        | In case of multiple testing for research questions, has this been handled appropriately?                                                                                                                              | 1  | <input checked="" type="checkbox"/> | <input checked="" type="checkbox"/> |
| <b>Questions for Results</b>                                              |                                                                                                                                                                                                                       |    |                                     |                                     |
| 48                                                                        | Does the provided data contribute to (at least partly) answering all aspects of the research questions, e.g. plan acceptability, dosimetric quality, deliverability and planning and delivery times?                  | 10 |                                     | <input checked="" type="checkbox"/> |
| <i>Dose distribution reporting</i>                                        |                                                                                                                                                                                                                       |    |                                     |                                     |
| 49                                                                        | Are complete summaries of the dose distributions in the patient cohort provided (low doses, high doses, OARs, PTV, patient, etc.)?                                                                                    | 5  |                                     | <input checked="" type="checkbox"/> |
| 50                                                                        | Are tables and figures optimised to clearly present the results obtained?                                                                                                                                             | 1  | <input checked="" type="checkbox"/> | <input checked="" type="checkbox"/> |
| 51                                                                        | Have the answers to the research questions been illustrated for an example patient by providing dose distributions, DVHs, etc.?                                                                                       | 1  | <input checked="" type="checkbox"/> | <input checked="" type="checkbox"/> |
| <i>Plan acceptability reporting – minor and major protocol deviations</i> |                                                                                                                                                                                                                       |    |                                     |                                     |
| 52                                                                        | In case of treatment technique or planning technique comparisons, was plan acceptability reported separately for each technique?                                                                                      | 1  | <input checked="" type="checkbox"/> | <input checked="" type="checkbox"/> |
| 53                                                                        | Has plan acceptability been reported in sufficient detail: how many plans were acceptable, how many were not and for what reasons (e.g. violation of hard constraints, violation of soft constraints, other reasons)? | 1  | <input checked="" type="checkbox"/> | <input checked="" type="checkbox"/> |
| 54                                                                        | Was there adequate reporting of minor and major protocol deviations?                                                                                                                                                  | 1  | <input checked="" type="checkbox"/> | <input checked="" type="checkbox"/> |
| <i>Deliverability and complexity reporting</i>                            |                                                                                                                                                                                                                       |    |                                     |                                     |
| 55                                                                        | Has the deliverability of the plans been adequately reported?                                                                                                                                                         | 1  | <input checked="" type="checkbox"/> | <input checked="" type="checkbox"/> |
| 56                                                                        | Have plan deliverability and complexity been investigated in sufficient detail in relation to the posed research questions?                                                                                           | 1  | <input checked="" type="checkbox"/> | <input checked="" type="checkbox"/> |
| <i>Planning and delivery times reporting</i>                              |                                                                                                                                                                                                                       |    |                                     |                                     |
| 57                                                                        | Have planning and delivery times been adequately evaluated and reported?                                                                                                                                              | 1  | <input checked="" type="checkbox"/> | <input checked="" type="checkbox"/> |
| <i>Patient-specific analyses reporting</i>                                |                                                                                                                                                                                                                       |    |                                     |                                     |
| 58                                                                        | Is there sufficient description of inter-patient variations in the results presented?                                                                                                                                 | 1  | <input checked="" type="checkbox"/> | <input type="checkbox"/>            |
| 59                                                                        | Have outlier patients been reported and has any exclusion from population analyses been sufficiently motivated and explained?                                                                                         | 1  | <input checked="" type="checkbox"/> | <input checked="" type="checkbox"/> |

|                                              |                                                                                                                                           |    |                                                                                       |                                     |
|----------------------------------------------|-------------------------------------------------------------------------------------------------------------------------------------------|----|---------------------------------------------------------------------------------------|-------------------------------------|
| <i>Statistical reporting</i>                 |                                                                                                                                           |    |                                                                                       |                                     |
| 60                                           | Are the p-values reported appropriately?                                                                                                  | 1  | <input checked="" type="checkbox"/>                                                   | <input checked="" type="checkbox"/> |
| 61                                           | Are there confidence intervals for the appropriate parameters?                                                                            | 1  | <input checked="" type="checkbox"/>                                                   | <input type="checkbox"/>            |
| <b>Questions for discussions</b>             |                                                                                                                                           |    |                                                                                       |                                     |
| 62                                           | Is there an overall interpretation of the data presented in the Results section as to how the posed research questions are answered?      | 10 |    | <input checked="" type="checkbox"/> |
| <i>Comparison with literature</i>            |                                                                                                                                           |    |                                                                                       |                                     |
| 63                                           | Has the study been sufficiently discussed in the context of existing literature?                                                          | 5  |    | <input type="checkbox"/>            |
| <i>Clinical and statistical significance</i> |                                                                                                                                           |    |                                                                                       |                                     |
| 64                                           | Does the discussion focus on statistically significant results?                                                                           | 1  | <input checked="" type="checkbox"/>                                                   | <input checked="" type="checkbox"/> |
| 65                                           | Is the potential clinical significance of the results clearly discussed (assuming practical application would be feasible)?               | 5  |    | <input checked="" type="checkbox"/> |
| <i>Clinical applicability of the study</i>   |                                                                                                                                           |    |                                                                                       |                                     |
| 66                                           | Is future the clinical applicability sufficiently discussed?                                                                              | 1  | <input checked="" type="checkbox"/>                                                   | <input checked="" type="checkbox"/> |
| <i>Study limitations</i>                     |                                                                                                                                           |    |                                                                                       |                                     |
| 67                                           | Has the impact of the study limitations on the provided answers to the research questions been sufficiently discussed?                    | 10 |    | <input checked="" type="checkbox"/> |
| <i>Future work</i>                           |                                                                                                                                           |    |                                                                                       |                                     |
| 68                                           | Has the potential future work arising from the study been discussed?                                                                      | 1  | <input checked="" type="checkbox"/>                                                   | <input checked="" type="checkbox"/> |
| <b>Questions for conclusions</b>             |                                                                                                                                           |    |                                                                                       |                                     |
| 69                                           | Do the presented conclusions represent answers to the posed research questions?                                                           | 5  |  | <input checked="" type="checkbox"/> |
| 70                                           | Are the conclusions fully supported by the results?                                                                                       | 5  |  | <input checked="" type="checkbox"/> |
| 71                                           | Are the conclusions a fair summary of all results?                                                                                        | 5  |  | <input checked="" type="checkbox"/> |
| <b>Questions for supplementary</b>           |                                                                                                                                           |    |                                                                                       |                                     |
| <i>Supplementary materials</i>               |                                                                                                                                           |    |                                                                                       |                                     |
| 72                                           | Is the information presented in the supplementary material of sufficient relevance?                                                       | 1  | <input checked="" type="checkbox"/>                                                   | <input checked="" type="checkbox"/> |
| 73                                           | Is the presentation of the included information of sufficient quality, including readability?                                             | 1  | <input checked="" type="checkbox"/>                                                   | <input checked="" type="checkbox"/> |
| 74                                           | Has sufficient underlying data been made available or a willingness to share data been indicated, within local data sharing restrictions? | 5  |  | <input type="checkbox"/>            |
| <b>RATING remarks</b>                        |                                                                                                                                           |    |                                                                                       |                                     |
| 75                                           | Is the RATING score added to the manuscript?                                                                                              | 5  |  | <input checked="" type="checkbox"/> |
| 76                                           | Is the accompanying question table added to the cover letter or the supplementary material?                                               | 1  | <input checked="" type="checkbox"/>                                                   | <input checked="" type="checkbox"/> |

**RATING score**  
**RATING fraction**

**90%**  
**189 of 211**

## Supplemental Figures

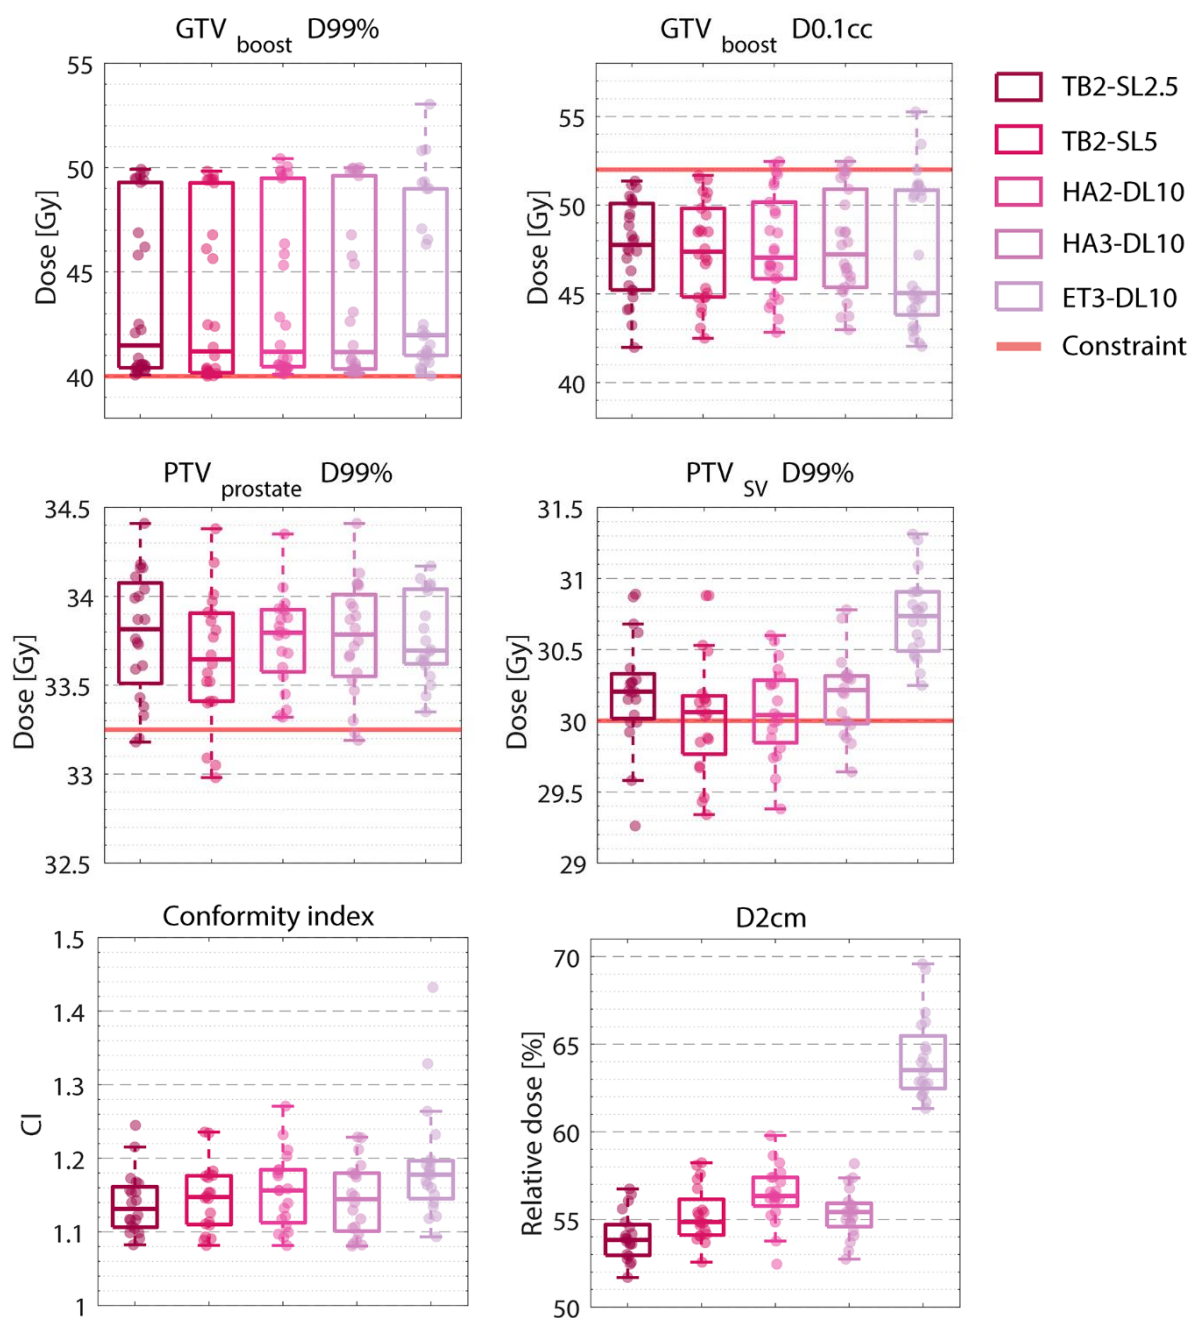

**Supplemental Figure 1. Target coverage and high and intermediate dose spillage.** Results are shown as boxplots over all patients for TB2-SL2.5 (outer left), TB2-SL5 (middle left), HA2-DL10 (middle), HA3-DL10 (middle right) and ET3-DL10 (outer right). The dots represent individual patients. Target volume dose prescriptions and constraints are indicated by a red solid line. The conformity index and dose at 2cm (D2cm) are calculated for PTV<sub>prostate</sub> and a prescribed dose of 35 Gy. The corresponding values are presented in Table 3.

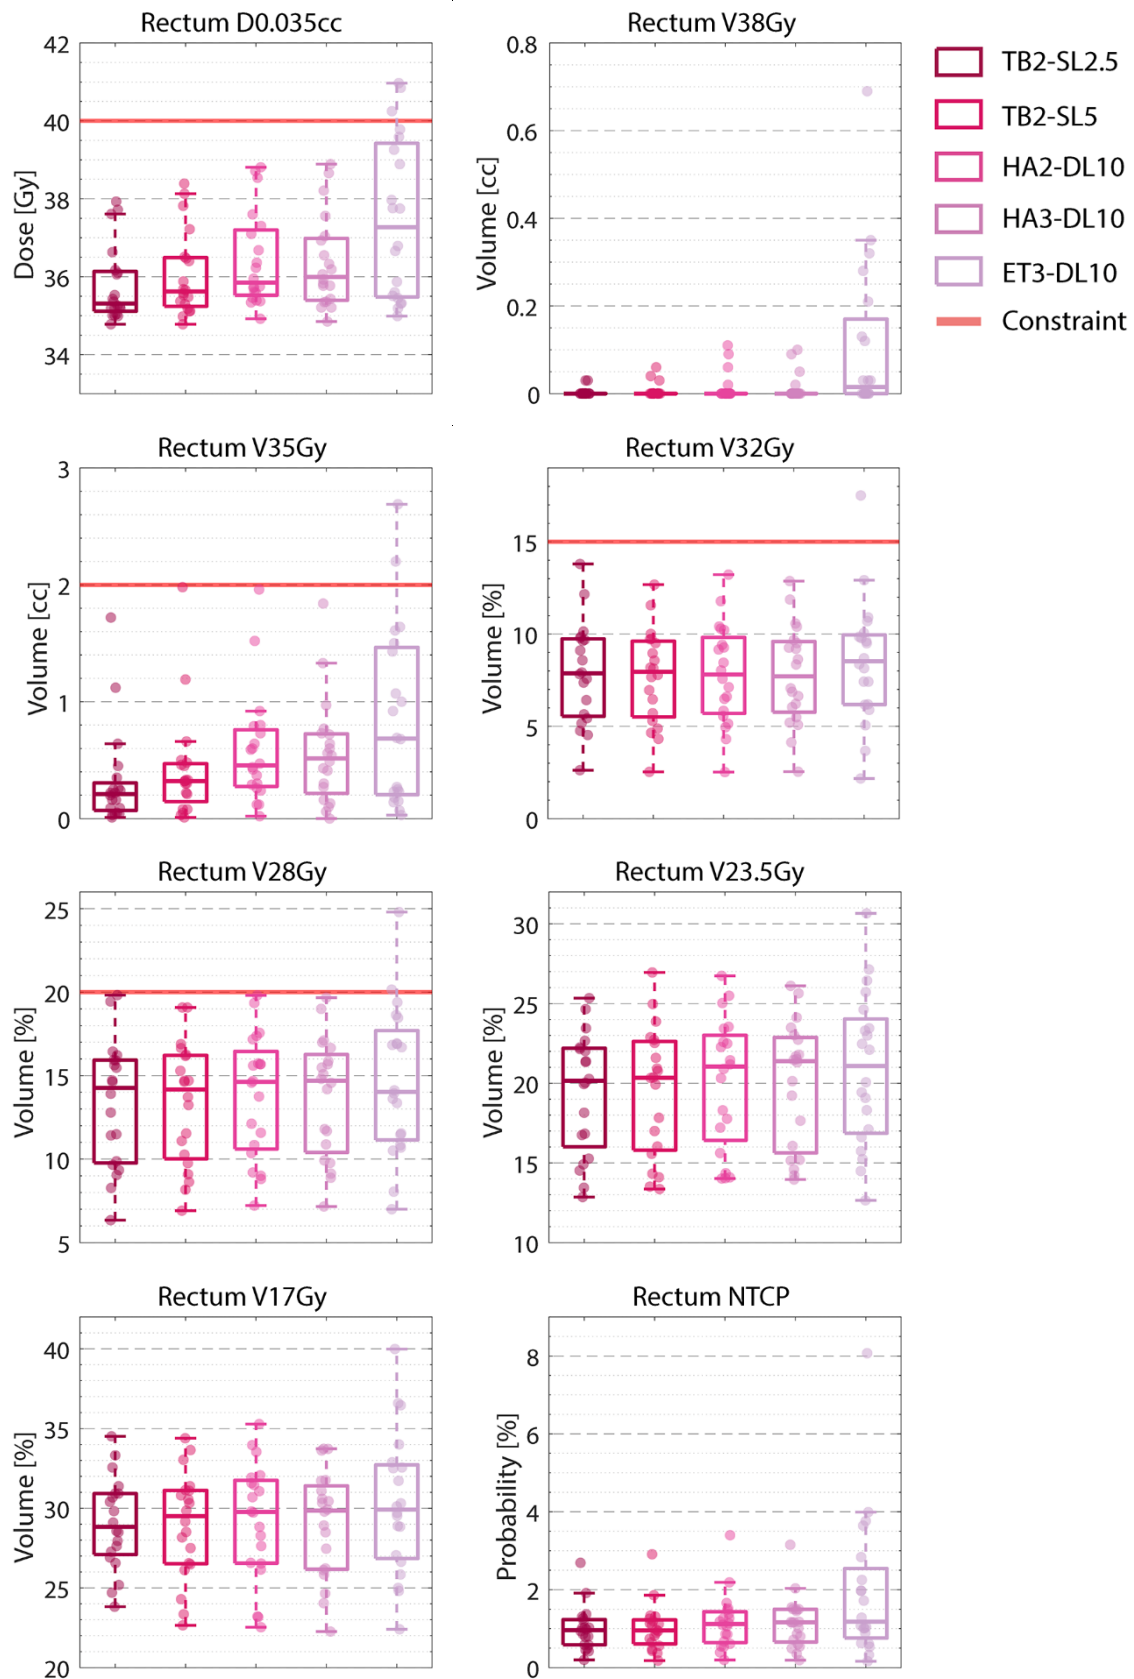

**Supplemental Figure 2. Dose to the rectum.** Results are shown as boxplots over all patients for TB2-SL2.5 (outer left), TB2-SL5 (middle left), HA2-DL10 (middle), HA3-DL10 (middle right) and ET3-DL10 (outer right). The dots represent individual patients. OAR dose constraints are indicated by a red solid line. The corresponding values are presented in Table 4.



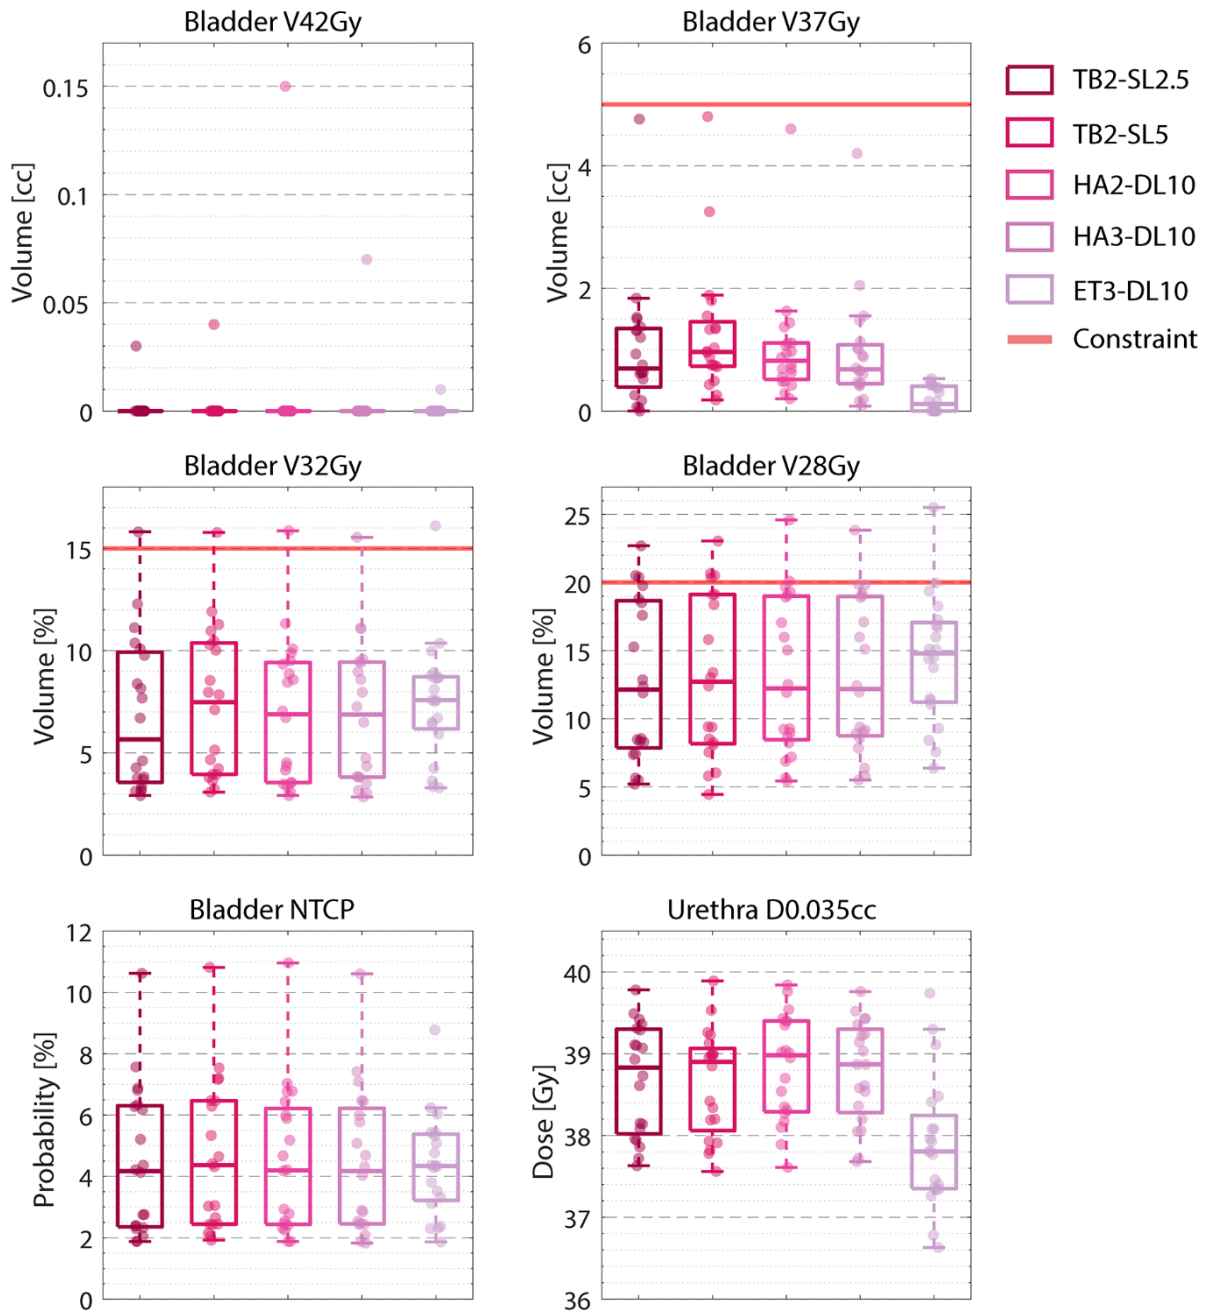

**Supplemental Figure 3. Dose to the bladder and urethra.** Results are shown as boxplots over all patients for TB2-SL2.5 (outer left), TB2-SL5 (middle left), HA2-DL10 (middle), HA3-DL10 (middle right) and ET3-DL10 (outer right). The dots represent individual patients. OAR dose constraints are indicated by a red solid line. The corresponding values are presented in Table 4.

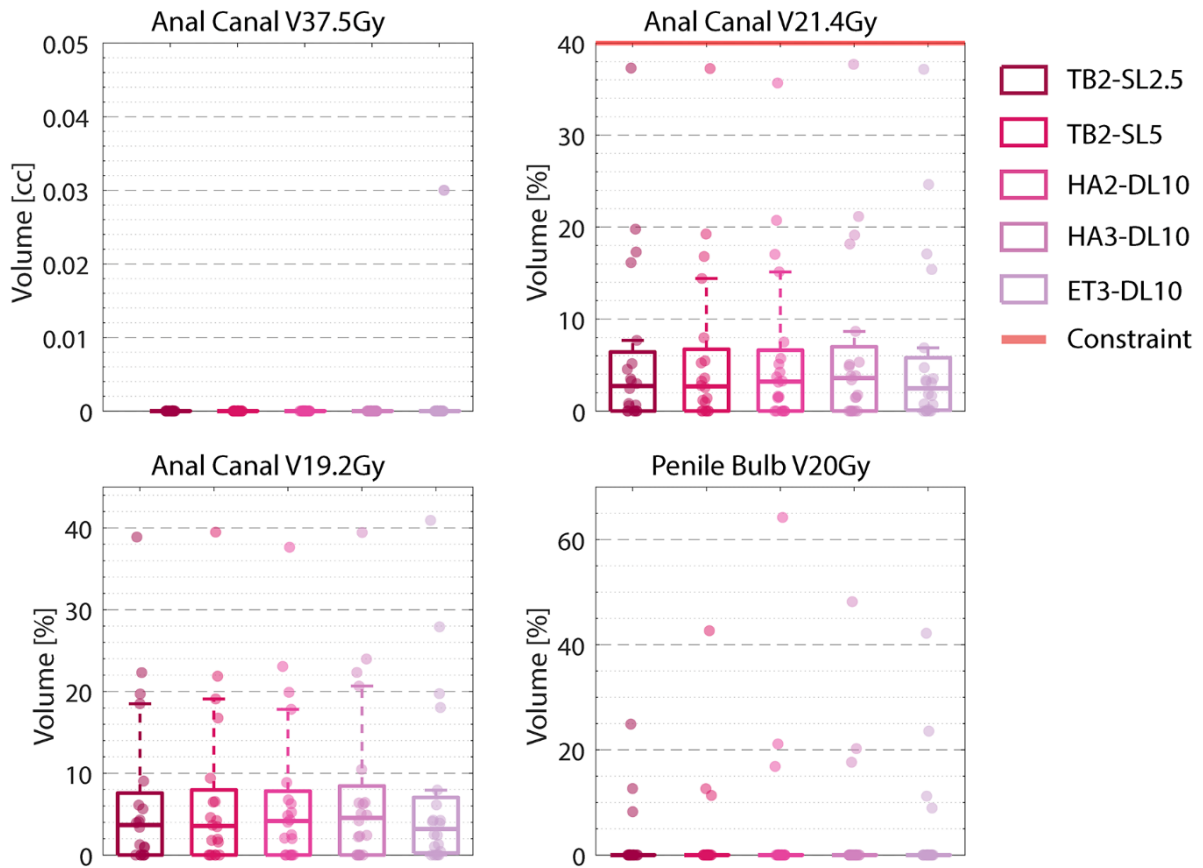

**Supplemental Figure 4. Dose to the anal canal and penile bulb.** Results are shown as boxplots over all patients for TB2-SL2.5 (outer left), TB2-SL5 (middle left), HA2-DL10 (middle), HA3-DL10 (middle right) and ET3-DL10 (outer right). The dots represent individual patients. OAR dose constraints are indicated by a red solid line. The corresponding values are presented in Table 4.

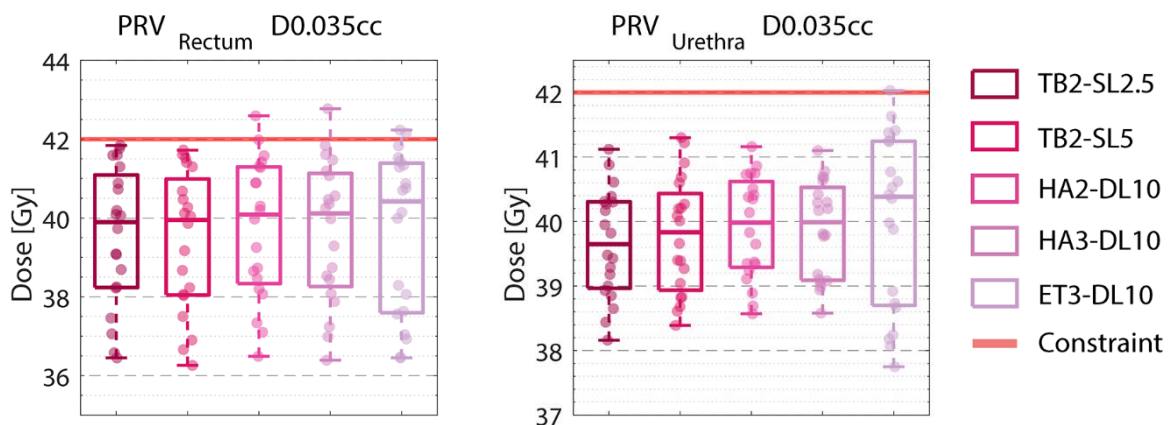

**Supplemental Figure 5. Dose to the PRVs.** Results are shown as boxplots over all patients for TB2-SL2.5 (outer left), TB2-SL5 (middle left), HA2-DL10 (middle), HA3-DL10 (middle right) and ET3-DL10 (outer right). The dots represent individual patients. OAR dose constraints are indicated by a red solid line. The corresponding values are presented in Table 4.



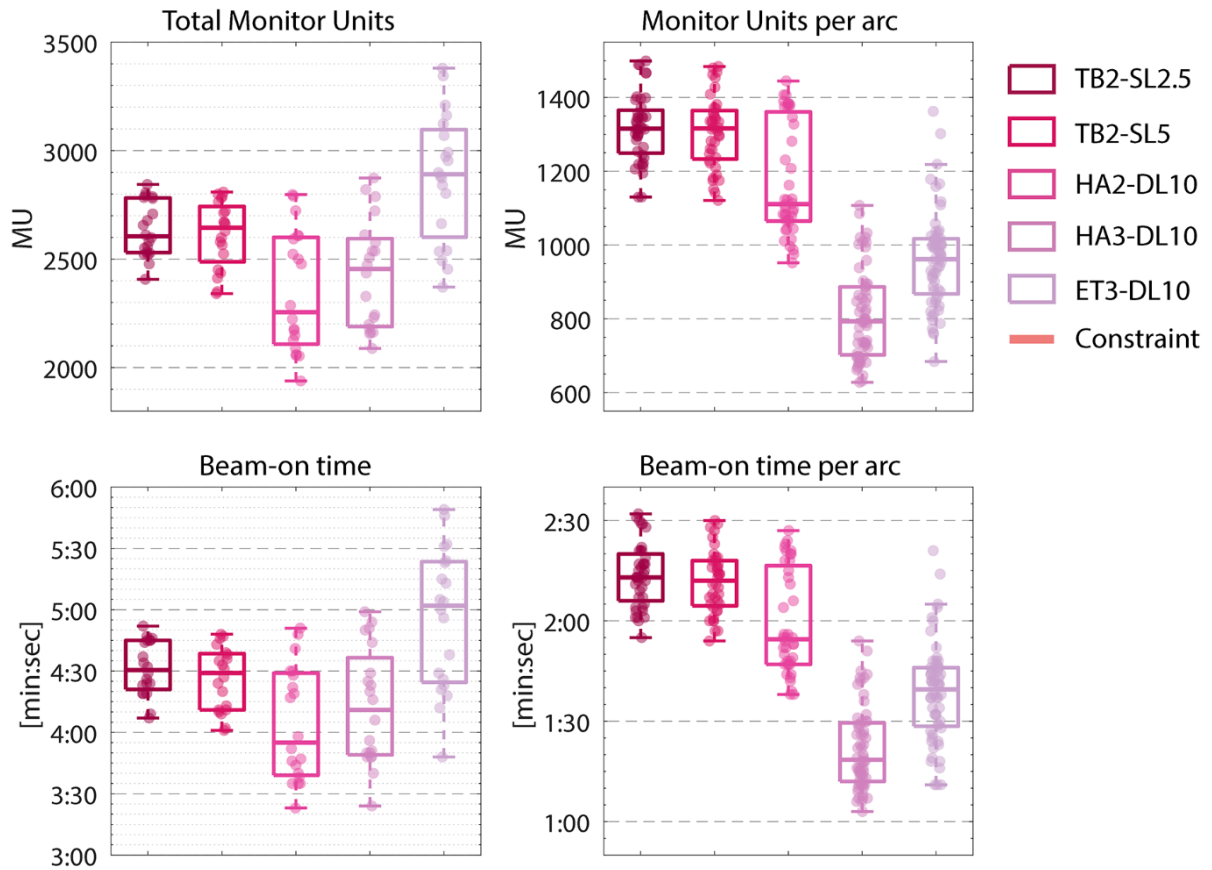

**Supplemental Figure 6. Beam delivery parameters.** Results are shown as boxplots over all patients for TB2-SL2.5 (outer left), TB2-SL5 (middle left), HA2-DL10 (middle), HA3-DL10 (middle right) and ET3-DL10 (outer right). The dots represent individual patients. The corresponding values are presented in Table 5.

## Supplemental Tables

| <b>Supplemental Table 1</b> Imaging procedures and parameters used for patient simulation. |                                |                       |                   |           |
|--------------------------------------------------------------------------------------------|--------------------------------|-----------------------|-------------------|-----------|
| <b>Imaging modality</b>                                                                    | <b>CT</b>                      | <b>mpMRI</b>          |                   |           |
| Equipment model                                                                            | Siemens Somatom Sensation Open | Siemens Magnetom 1.5T |                   |           |
| Sequence                                                                                   |                                | T2w                   | DWI               | DCE       |
| Voxel size [mm <sup>2</sup> ]                                                              | 0.7 x 0.7                      | 0.6 x 0.6             | 2.7 x 2.7         | 1.4 x 1.4 |
| Slice thickness [mm]                                                                       | 1.0                            | 3.0                   | 4.0               | 4.0       |
| Nominal energy [kVp]                                                                       | 125                            | -                     | -                 | -         |
| Tube current [mAs]                                                                         | AEC                            | -                     | -                 | -         |
| TR [ms]                                                                                    | -                              | 11250                 | 9900              | 4.7       |
| TE [ms]                                                                                    | -                              | 124                   | 67                | 1.6       |
| Options                                                                                    | -                              | -                     | B = 0, 1000, 1400 | -         |

Abbreviations: T2w = T2-weighted; DWI = diffusion weighted imaging; DCE = dynamic contrast enhanced; AEC = Automatic exposure control; TR = repetition time; TE = echo time.

**Supplemental Table 2** Initial optimization objectives that were used during manual treatment planning of TB2-SL2.5.

| Structure                         | Objective type | Volume [%] | Dose [Gy] | Priority |
|-----------------------------------|----------------|------------|-----------|----------|
| <b>Target coverage objectives</b> |                |            |           |          |
| GTV <sub>boost</sub>              | Upper          | 0.0        | 52.0      | 80       |
|                                   | Lower          | 100.0      | 40.0      | 200      |
| CTV <sub>prostate</sub>           | Upper          | 0.0        | 52.0      | 80       |
|                                   | Lower          | 100.0      | 35.0      | 120      |
| PTV <sub>prostate</sub>           | Upper          | 95.0       | 35.0      | 150      |
|                                   | Lower          | 95.0       | 35.0      | 150      |
| PTV <sub>SV</sub>                 | Lower          | 100.0      | 33.25     | 180      |
|                                   | Upper          | 0.0        | 35.0      | 80       |
|                                   | Lower          | 100.0      | 30.0      | 150      |
| <b>OAR dose objectives</b>        |                |            |           |          |
| Rectum                            | Upper          | 0.0        | 36.0      | 180      |
|                                   | Upper          | 0.1        | 35.0      | 100      |
|                                   | Upper          | 20.0       | 28.0      | 150      |
|                                   | Upper          | 40.0       | 10.0      | 150      |
| PRV <sub>rectum</sub>             | Upper          | 0.0        | 40.0      | 220      |
| Bladder                           | Upper          | 20.0       | 27.5      | 150      |
| Urethra                           | Upper          | 0.0        | 40.0      | 180      |
|                                   | Upper          | 20.0       | 39.0      | 120      |
| PRV <sub>urethra</sub>            | Upper          | 0.0        | 40.0      | 220      |
| Anal canal                        | Upper          | 39.5       | 21.4      | 150      |
|                                   | Upper          | 59.9       | 19.2      | 150      |
|                                   | Upper          | 0.0        | 37.5      | 150      |
| Small bowel                       | Upper          | 0.0        | 34.5      | 180      |
| Penile bulb                       | Upper          | 90.0       | 20.0      | 180      |
| Femoral joint                     | Upper          | 5.0        | 27.0      | 150      |
| <b>Auxiliary objectives</b>       |                |            |           |          |
| NS_GTV <sub>boost</sub> +4mm      | Upper          | 0.0        | 52.0      | 80       |
|                                   | Lower          | 100.0      | 40.0      | 200      |
| NS_CTV <sub>crop</sub>            | Lower          | 100.0      | 35.5      | 220      |
| NS_PTV <sub>crop</sub>            | Upper          | 0.0        | 38.5      | 120      |
|                                   | Lower          | 100.0      | 35.0      | 150      |
| NS_PTV <sub>inRect</sub>          | Upper          | 0.0        | 35.0      | 150      |
|                                   | Lower          | 100.0      | 33.25     | 150      |
| NS_PTV <sub>minRect</sub>         | Lower          | 100.0      | 35.0      | 150      |
| NS_01_Ring_04                     | Upper          | 0.0        | 35.0      | 120      |
| NS_05_Ring_15                     | Upper          | 0.0        | 28.0      | 120      |
| NS_20_Ring_10                     | Upper          | 0.0        | 17.5      | 120      |

**Supplemental Table 3** Initial clinical goals that were used as starting point for automated treatment planning of ET3-DL10

| Structure                    | Clinical goal                                          | Priority |
|------------------------------|--------------------------------------------------------|----------|
| <b>Target coverage goals</b> |                                                        |          |
| GTV <sub>boost</sub>         | $D_{99\%} \geq 40.0$ Gy                                | 1        |
|                              | $V_{40\text{Gy}} \geq 99.0\%$                          | 1        |
| CTV <sub>prostate</sub>      | $D_{0.1\text{cc}} \leq 52.0$ Gy                        | 4        |
|                              | $D_{99\%} \geq 35.0$ Gy                                | 1        |
| PTV <sub>prostate</sub>      | $D_{95\%} \geq 35.0$ Gy                                | 2        |
|                              | $D_{95\%} \leq 35.0$ Gy                                | 2        |
| CTV <sub>SV</sub>            | $D_{99\%} \geq 33.25$ Gy                               | 1        |
|                              | $D_{99\%} \geq 30.0$ Gy                                | 1        |
| PTV <sub>SV</sub>            | $D_{99\%} \geq 30.0$ Gy                                | 1        |
|                              | $D_{0.03\text{cc}} \leq 35.0$ Gy                       | 4        |
| <b>OAR goals</b>             |                                                        |          |
| Rectum                       | $D_{0.03\text{cc}} \leq 40.0$ Gy                       | 1        |
|                              | $V_{38\text{Gy}} \leq 0.5$ cc (Var: $\leq 1.0$ cc)     | 2        |
|                              | $V_{35\text{Gy}} \leq 1.0$ cc (Var: $\leq 2.0$ cc)     | 1        |
|                              | $V_{32\text{Gy}} \leq 15\%$                            | 3        |
|                              | $V_{28\text{Gy}} \leq 20\%$                            | 3        |
|                              | $V_{23.5\text{Gy}} \leq 50\%$                          | 3        |
|                              | $V_{17\text{Gy}} \leq 75\%$                            | 3        |
| PRV <sub>rectum</sub>        | $V_{10\text{Gy}} \leq 40\%$                            | 4        |
|                              | $D_{0.03\text{cc}} \leq 42.0$ Gy                       | 1        |
| Bladder                      | $D_{0.03\text{cc}} \leq 40.0$ Gy                       | 3        |
|                              | $V_{42\text{Gy}} \leq 0.1$ cc (Var: $\leq 1.0$ cc)     | 2        |
|                              | $V_{37\text{Gy}} \leq 3.0$ cc (Var: $\leq 5.0$ cc)     | 2        |
|                              | $V_{32\text{Gy}} \leq 15\%$                            | 2        |
| Urethra                      | $V_{28\text{Gy}} \leq 20\%$                            | 1        |
|                              | $D_{0.03\text{cc}} \leq 40.0$ Gy (Var: $\leq 42.0$ Gy) | 1        |
| PRV <sub>urethra</sub>       | $D_{0.03\text{cc}} \leq 42.0$ Gy                       | 1        |
|                              | $D_{0.03\text{cc}} \leq 40.0$ Gy (Var: $\leq 42.0$ Gy) | 3        |
| Anal canal                   | $D_{\text{mean}} \leq 17.0$ Gy                         | 3        |
|                              | $V_{37.85\text{Gy}} \leq 1.0$ cc                       | 3        |
|                              | $V_{23.4\text{Gy}} \leq 40.0\%$                        | 3        |
|                              | $V_{19.7\text{Gy}} \leq 60.0\%$                        | 3        |
| Penile bulb                  | $V_{20\text{Gy}} \leq 50.0\%$ (Var: $\leq 90.0\%$ )    | 3        |
| Femoral joint                | $V_{28\text{Gy}} \leq 3.0\%$ (Var: $\leq 5.0\%$ )      | 3        |

(continued on next page)

| <b>Supplemental Table 3</b> (continued)                                                                    |                                                                  |   |
|------------------------------------------------------------------------------------------------------------|------------------------------------------------------------------|---|
| <b>Auxiliary goals</b>                                                                                     |                                                                  |   |
| NS_PTV_crop                                                                                                | $D_{99\%} \geq 35.0 \text{ Gy}$                                  | 3 |
|                                                                                                            | $D_{0.03cc} \leq 38.5 \text{ Gy}$ (Var: $\leq 39.5 \text{ Gy}$ ) | 3 |
| Abbreviations: Var: allowed variability of the clinical goal that does not result in a protocol violation. |                                                                  |   |
| The priority of each goal is specified on a scale from 1 (most important) to 4 (less important).           |                                                                  |   |

Auxiliary structures:

- NS\_GTV<sub>boost</sub>+4mm is defined as GTV<sub>boost</sub> with a 4 mm isotropic margin excluding all OARs and PRVs.
- NS\_CTV\_crop is defined as CTV<sub>prostate</sub> with a 1 mm isotropic inner margin excluding GTV<sub>boost</sub> with a 4 mm isotropic margin.
- NS\_PTV\_crop is defined as PTV<sub>prostate</sub> excluding GTV<sub>boost</sub> with a 7 mm isotropic margin and also excluding the rectum and bladder.
- NS\_PTVinRect is defined as the overlap between PTV<sub>prostate</sub> and the rectum.
- NS\_PTVminRect is defined as PTV<sub>prostate</sub> excluding the rectum.
- NS\_01\_Ring\_04 is a wall structure starting at 1 mm outside of PTV<sub>prostate</sub> and PTV<sub>SV</sub> and is 4 mm wide.
- NS\_05\_Ring\_15 is a wall structure starting at 5 mm outside of PTV<sub>prostate</sub> and PTV<sub>SV</sub> and is 15 mm wide.
- NS\_20\_Ring\_10 is a wall structure starting at 20 mm outside of PTV<sub>prostate</sub> and PTV<sub>SV</sub> and is 10 mm wide.

**Supplemental Table 4** Pairwise dosimetric comparison between all planning techniques.

|                           | TB2-SL5<br>vs<br>TB2-SL2.5<br>Median (range) | HA2-DL10<br>vs<br>TB2-SL2.5<br>Median (range) | HA3-DL10<br>vs<br>TB2-SL2.5<br>Median (range) | ET3-DL10<br>vs<br>TB2-SL2.5<br>Median (range) | HA2-DL10<br>vs<br>TB2-SL5<br>Median (range) | HA3-DL10<br>vs<br>TB2-SL5<br>Median (range) | ET3-DL10<br>vs<br>TB2-SL5<br>Median (range) | HA3-DL10<br>vs<br>HA2-DL10<br>Median (range) | ET3-DL10<br>vs<br>HA2-DL10<br>Median (range) | ET3-DL10<br>vs<br>HA3-DL10<br>Median (range) |
|---------------------------|----------------------------------------------|-----------------------------------------------|-----------------------------------------------|-----------------------------------------------|---------------------------------------------|---------------------------------------------|---------------------------------------------|----------------------------------------------|----------------------------------------------|----------------------------------------------|
| <b>Target coverage</b>    |                                              |                                               |                                               |                                               |                                             |                                             |                                             |                                              |                                              |                                              |
| GTV <sub>boost</sub>      |                                              |                                               |                                               |                                               |                                             |                                             |                                             |                                              |                                              |                                              |
| D <sub>99%</sub> [Gy]     | -0.1<br>(-0.7, 0.2)                          | 0.0<br>(-0.6, 0.7)                            | 0.0<br>(-0.6, 0.9)                            | 0.2<br>(-1.0, 3.6)                            | 0.2<br>(-0.4, 0.6)                          | 0.2<br>(-0.4, 0.7)                          | 0.4<br>(-0.5, 3.7)                          | 0.0<br>(-0.4, 0.4)                           | 0.3<br>(-1.1, 3.4)                           | 0.3<br>(-1.1, 3.1)                           |
| D <sub>0.1cc</sub> [Gy]   | 0.0<br>(-2.4, 0.9)                           | 0.2<br>(-1.9, 1.5)                            | 0.4<br>(-1.5, 1.8)                            | -0.5<br>(-4.9, 4.3)                           | 0.3<br>(-1.1, 1.6)                          | 0.4<br>(-1.9, 2.1)                          | -0.4<br>(-4.4, 4.0)                         | 0.1<br>(-1.3, 1.8)                           | -1.1<br>(-4.4, 3.8)                          | -1.0<br>(-4.8, 3.4)                          |
| PTV <sub>prostate</sub>   |                                              |                                               |                                               |                                               |                                             |                                             |                                             |                                              |                                              |                                              |
| D <sub>99%</sub> [Gy]     | -0.2<br>(-0.3, 0.1)                          | -0.1<br>(-0.3, 0.3)                           | 0.0<br>(-0.2, 0.2)                            | -0.1<br>(-0.6, 0.9)                           | 0.1<br>(-0.3, 0.4)                          | 0.1<br>(-0.1, 0.5)                          | 0.1<br>(-0.6, 1.1)                          | -0.2<br>(-0.2, 0.2)                          | 0.0<br>(-0.4, 0.8)                           | -0.1<br>(-0.5, 0.9)                          |
| PTV <sub>SV</sub>         |                                              |                                               |                                               |                                               |                                             |                                             |                                             |                                              |                                              |                                              |
| D <sub>99%</sub> [Gy]     | -0.2<br>(-0.6, 0.3)                          | -0.2<br>(-0.4, 0.1)                           | 0.0<br>(-0.6, 0.4)                            | 0.5<br>(-0.2, 1.2)                            | -0.1<br>(-0.4, 0.6)                         | 0.1<br>(-0.2, 0.8)                          | 0.7<br>(-0.3, 1.4)                          | 0.1<br>(-0.3, 0.4)                           | 0.7<br>(0.1, 1.2)                            | 0.6<br>(-0.1, 1.0)                           |
| <b>Dose spillage</b>      |                                              |                                               |                                               |                                               |                                             |                                             |                                             |                                              |                                              |                                              |
| CI                        | 0.01<br>(-0.01, 0.03)                        | 0.02<br>(-0.03, 0.08)                         | 0.00<br>(-0.02, 0.06)                         | 0.04<br>(-0.08, 0.26)                         | 0.01<br>(-0.05, 0.08)                       | -0.01<br>(-0.03, 0.05)                      | 0.03<br>(-0.09, 0.26)                       | -0.01<br>(-0.06, 0.04)                       | 0.02<br>(-0.11, 0.25)                        | 0.03<br>(-0.07, 0.23)                        |
| D2cm [%]                  | 1.2<br>(0.7, 2.4)                            | 2.5<br>(0.7, 5.1)                             | 1.4<br>(-0.9, 3.1)                            | 9.8<br>(6.0, 15.7)                            | 1.1<br>(-0.6, 4.2)                          | 0.1<br>(-2.8, 1.6)                          | 8.5<br>(4.7, 14.8)                          | -1.0<br>(-3.3, 0.4)                          | 7.1<br>(4.5, 13.2)                           | 8.7<br>(4.6, 14.3)                           |
| <b>OAR dose</b>           |                                              |                                               |                                               |                                               |                                             |                                             |                                             |                                              |                                              |                                              |
| Rectum                    |                                              |                                               |                                               |                                               |                                             |                                             |                                             |                                              |                                              |                                              |
| D <sub>0.035cc</sub> [Gy] | 0.3<br>(0.0, 0.6)                            | 0.6<br>(0.1, 1.3)                             | 0.6<br>(0.1, 1.3)                             | 1.7<br>(0.1, 3.8)                             | 0.4<br>(-0.2, 0.8)                          | 0.3<br>(-0.1, 0.8)                          | 1.4<br>(-0.3, 3.6)                          | -0.1<br>(-0.4, 0.4)                          | 1.0<br>(-0.6, 3.4)                           | 0.8<br>(-0.8, 3.3)                           |
| V <sub>38Gy</sub> [cc]    | 0.00<br>(0.00, 0.04)                         | 0.00<br>(0.00, 0.09)                          | 0.00<br>(0.00, 0.10)                          | 0.02<br>(0.00, 0.66)                          | 0.00<br>(0.00, 0.05)                        | 0.00<br>(0.00, 0.06)                        | 0.02<br>(0.00, 0.63)                        | 0.00<br>(-0.02, 0.01)                        | 0.02<br>(0.00, 0.58)                         | 0.02<br>(0.00, 0.06)                         |
| V <sub>35Gy</sub> [cc]    | 0.11<br>(0.00, 0.26)                         | 0.25<br>(0.01, 0.54)                          | 0.20<br>(-0.01, 0.52)                         | 0.36 (-0.41,<br>1.57)                         | 0.16<br>(-0.02, 0.40)                       | 0.14<br>(-0.14, 0.40)                       | 0.30<br>(-0.43, 1.53)                       | -0.02<br>(-0.19, 0.12)                       | 0.07<br>(-0.69, 1.31)                        | 0.12<br>(-0.74, 1.45)                        |
| V <sub>32Gy</sub> [%]     | -0.2<br>(-1.1, 0.6)                          | -0.1<br>(-1.5, 0.9)                           | 0.0<br>(-1.5, 0.8)                            | 0.3<br>(-1.5, 3.8)                            | 0.2<br>(-1.0, 0.8)                          | 0.2<br>(-1.1, 1.1)                          | 0.4<br>(-1.4, 4.8)                          | 0.0<br>(-1.2, 0.6)                           | 0.5<br>(-2.0, 4.3)                           | 0.5<br>(-1.2, 4.6)                           |
| V <sub>28Gy</sub> [%]     | -0.1<br>(-1.0, 0.6)                          | 0.5<br>(-0.2, 1.3)                            | 0.3<br>(-0.7, 2.1)                            | 1.1<br>(-2.1, 5.0)                            | 0.5<br>(-0.6, 1.1)                          | 0.4<br>(-1.2, 1.5)                          | 0.7<br>(-1.9, 5.7)                          | -0.1<br>(-2.1, 1.3)                          | 0.3<br>(-2.2, 5.0)                           | 0.0<br>(-1.5, 5.1)                           |

*(continued on next page)*



**Supplementary Table 4** (continued)

|                              | TB2-SL5<br>vs<br>TB2-SL2.5 | HA2-DL10<br>vs<br>TB2-SL2.5 | HA3-DL10<br>vs<br>TB2-SL2.5 | ET3-DL10<br>vs<br>TB2-SL2.5 | HA2-DL10<br>vs<br>TB2-SL5 | HA3-DL10<br>vs<br>TB2-SL5 | ET3-DL10<br>vs<br>TB2-SL5 | HA3-DL10<br>vs<br>HA2-DL10 | ET3-DL10<br>vs<br>HA2-DL10 | ET3-DL10<br>vs<br>HA3-DL10 |
|------------------------------|----------------------------|-----------------------------|-----------------------------|-----------------------------|---------------------------|---------------------------|---------------------------|----------------------------|----------------------------|----------------------------|
|                              | Median (range)             | Median (range)              | Median (range)              | Median (range)              | Median (range)            | Median (range)            | Median (range)            | Median (range)             | Median (range)             | Median (range)             |
| <b>Rectum</b>                |                            |                             |                             |                             |                           |                           |                           |                            |                            |                            |
| V <sub>23.5Gy</sub> [%]      | 0.0<br>(-1.0, 2.3)         | 0.5<br>(-0.9, 2.1)          | 0.6<br>(-1.2, 2.5)          | 1.7<br>(-2.8, 5.3)          | 0.6<br>(-0.4, 1.4)        | 0.4<br>(-0.8, 2.2)        | 1.0<br>(-2.2, 5.7)        | -0.3<br>(-1.5, 1.6)        | 0.8<br>(-3.2, 5.2)         | 0.6<br>(-2.3, 5.0)         |
| V <sub>20.5Gy</sub> [%]      | 0.0<br>(-1.5, 1.2)         | 0.2<br>(-1.6, 2.0)          | 0.4<br>(-1.9, 1.8)          | 1.3<br>(-3.0, 5.7)          | 0.5<br>(-1.2, 1.6)        | 0.3<br>(-1.0, 2.2)        | 0.8<br>(-2.5, 5.8)        | -0.2<br>(-1.7, 1.5)        | 1.0<br>(-3.4, 5.5)         | 0.6<br>(-2.1, 5.3)         |
| V <sub>17Gy</sub> [%]        | 0.0<br>(-2.1, 1.0)         | 0.2<br>(-2.2, 2.7)          | -0.1<br>(-2.4, 1.8)         | 0.7<br>(-2.5, 7.4)          | 0.2<br>(-2.3, -2.2)       | 0.2<br>(-2.0, 2.0)        | 1.1<br>(-1.9, 6.6)        | -0.3<br>(-1.6, 1.5)        | 1.0<br>(-3.0, 6.5)         | 0.7<br>(-1.7, 6.3)         |
| <b>PRV<sub>rectum</sub></b>  |                            |                             |                             |                             |                           |                           |                           |                            |                            |                            |
| D <sub>0.035cc</sub> [Gy]    | -0.1<br>(-0.5, 0.1)        | 0.2<br>(-0.6, 1.0)          | 0.1<br>(-0.7, 1.2)          | 0.0<br>(-1.5, 2.0)          | 0.2<br>(-0.2, 0.9)        | 0.2<br>(-0.2, 1.1)        | 0.2<br>(-1.1, 2.0)        | -0.1<br>(-0.4, 0.2)        | -0.1<br>(-1.3, 1.3)        | -0.2<br>(-1.5, 1.8)        |
| <b>Bladder</b>               |                            |                             |                             |                             |                           |                           |                           |                            |                            |                            |
| V <sub>42Gy</sub> [cc]       | 0.00<br>(0.00, 0.01)       | 0.00<br>(0.00, 0.12)        | 0.00<br>(0.00, 0.04)        | 0.00<br>(-0.02, 0.00)       | 0.00<br>(0.00, 0.11)      | 0.00<br>(0.00, 0.03)      | 0.00<br>(-0.03, 0.00)     | 0.00<br>(-0.08, 0.00)      | 0.00<br>(-0.14, 0.00)      | 0.00<br>(-0.06, 0.00)      |
| V <sub>37Gy</sub> [cc]       | 0.21<br>(-0.17, 1.75)      | -0.02<br>(-0.73, 0.52)      | 0.01<br>(-0.84, 0.74)       | -0.61<br>(-4.27, 0.00)      | -0.19<br>(-2.48, 0.29)    | -0.30<br>(-2.59, 0.25)    | -0.77<br>(-4.31, -0.18)   | -0.05<br>(-0.50, 0.42)     | -0.69<br>(-4.11, -0.20)    | -0.57<br>(-3.71, -0.08)    |
| V <sub>32Gy</sub> [%]        | 0.2<br>(-0.4, 7.6)         | -0.1<br>(-1.0, 6.1)         | -0.3<br>(-1.8, 6.0)         | 0.5<br>(-2.5, 5.4)          | -0.4<br>(-1.5, 0.6)       | -0.3<br>(-2.1, 1.0)       | 0.3<br>(-2.7, 3.9)        | 0.0<br>(-0.9, 1.0)         | 0.4<br>(-1.5, 4.0)         | 0.5<br>(-2.5, 3.8)         |
| V <sub>28Gy</sub> [%]        | 0.5<br>(-1.1, 1.1)         | 0.4<br>(-1.1, 2.2)          | 0.4<br>(-1.2, 2.3)          | 1.9<br>(-2.9, 6.2)          | -0.1<br>(-1.4, 1.7)       | 0.0<br>(-1.4, 1.7)        | 1.5<br>(-3.5, 6.3)        | 0.0<br>(-0.8, 0.7)         | 1.0<br>(-2.8, 5.7)         | 1.0<br>(-3.0, 5.6)         |
| <b>Urethra</b>               |                            |                             |                             |                             |                           |                           |                           |                            |                            |                            |
| D <sub>0.035cc</sub> [Gy]    | 0.0<br>(-0.4, 0.2)         | 0.1<br>(-0.6, 0.8)          | 0.1<br>(-0.4, 0.8)          | -0.8<br>(-1.5, 0.3)         | 0.2<br>(-0.6, 1.1)        | 0.1<br>(-0.2, 1.1)        | -0.9<br>(-1.5, 0.3)       | -0.1<br>(-0.7, 0.5)        | -1.0<br>(-2.0, 0.2)        | -1.1<br>(-1.5, 0.3)        |
| <b>PRV<sub>urethra</sub></b> |                            |                             |                             |                             |                           |                           |                           |                            |                            |                            |
| D <sub>0.035cc</sub> [Gy]    | 0.0<br>(-0.2, 1.4)         | 0.2<br>(-0.7, 1.5)          | 0.1<br>(-0.3, 1.4)          | 0.6<br>(-1.6, 1.3)          | 0.2<br>(-0.7, 0.5)        | 0.1<br>(-0.6, 0.6)        | 0.3<br>(-1.5, 1.4)        | -0.1<br>(-0.4, 1.1)        | 0.2<br>(-1.7, 1.4)         | 0.2<br>(-1.6, 1.4)         |
| <b>Anal canal</b>            |                            |                             |                             |                             |                           |                           |                           |                            |                            |                            |
| V <sub>37.85Gy</sub> [cc]    | -                          | -                           | -                           | -                           | -                         | -                         | -                         | -                          | -                          | -                          |
| V <sub>21.4Gy</sub> [%]      | 0.0<br>(-1.7, 0.8)         | 0.2<br>(-4.6, 3.4)          | 0.5<br>(-0.6, 3.9)          | 0.0<br>(-2.1, 4.9)          | 0.1<br>(-4.1, 3.9)        | 0.3<br>(-0.2, 4.4)        | 0.0<br>(-2.4, 5.4)        | 0.0<br>(-0.4, 4.0)         | 0.0<br>(-3.7, 9.5)         | -0.2<br>(-4.1, 5.5)        |
| V <sub>19.2Gy</sub> [%]      | 0.0<br>(-1.8, 1.0)         | 0.3<br>(-4.5, 3.4)          | 0.7<br>(-0.1, 4.3)          | 0.0<br>(-2.2, 5.6)          | 0.1<br>(-4.1, 4.0)        | 0.4<br>(-0.2, 4.9)        | 0.0<br>(-2.6, 6.0)        | 0.2<br>(-0.4, 4.5)         | 0.0<br>(-3.3, 10.1)        | -0.1<br>(-4.2, 5.6)        |

*(continued on next page)*

**Supplementary Table 4** (continued)

|                                | TB2-SL5<br>vs<br>TB2-SL2.5<br>Median (range) | HA2-DL10<br>vs<br>TB2-SL2.5<br>Median (range) | HA3-DL10<br>vs<br>TB2-SL2.5<br>Median (range) | ET3-DL10<br>vs<br>TB2-SL2.5<br>Median (range) | HA2-DL10<br>vs<br>TB2-SL5<br>Median (range) | HA3-DL10<br>vs<br>TB2-SL5<br>Median (range) | ET3-DL10<br>vs<br>TB2-SL5<br>Median (range) | HA3-DL10<br>vs<br>HA2-DL10<br>Median (range) | ET3-DL10<br>vs<br>HA2-DL10<br>Median (range) | ET3-DL10<br>vs<br>HA3-DL10<br>Median (range) |
|--------------------------------|----------------------------------------------|-----------------------------------------------|-----------------------------------------------|-----------------------------------------------|---------------------------------------------|---------------------------------------------|---------------------------------------------|----------------------------------------------|----------------------------------------------|----------------------------------------------|
| <b>Penile bulb</b>             |                                              |                                               |                                               |                                               |                                             |                                             |                                             |                                              |                                              |                                              |
| V <sub>20Gy</sub> [%]          | 0.0<br>(-0.0, 17.8)                          | 0.0<br>(0.0, 39.3)                            | 0.0<br>(0.0, 23.3)                            | 0.0<br>(0.0, 17.3)                            | 0.0<br>(0.0, 21.6)                          | 0.0<br>(0.0, 7.6)                           | 0.0<br>(-0.5, 11.0)                         | 0.0<br>(-16.0, 0.8)                          | 0.0<br>(-22.0, 8.9)                          | 0.0<br>(-6.5, 8.9)                           |
| <b>Femoral head &amp; neck</b> |                                              |                                               |                                               |                                               |                                             |                                             |                                             |                                              |                                              |                                              |
| V <sub>28Gy</sub> [%]          | -                                            | -                                             | -                                             | -                                             | -                                           | -                                           | -                                           | -                                            | -                                            | -                                            |
| <b>NTCP</b>                    |                                              |                                               |                                               |                                               |                                             |                                             |                                             |                                              |                                              |                                              |
| Rectum [%]                     | 0.0<br>(-0.1, 0.2)                           | 0.1<br>(0.0, 0.7)                             | 0.1<br>(-0.1, 0.5)                            | 0.5<br>(-0.2, 5.4)                            | 0.1<br>(0.0, 0.5)                           | 0.1<br>(0.0, 0.5)                           | 0.5<br>(-0.2, 5.2)                          | 0.0<br>(-0.2, 0.2)                           | 0.4<br>(-0.2, 4.7)                           | 0.4<br>(-0.4, 4.9)                           |
| Bladder [%]                    | 0.2<br>(0.0, 0.4)                            | 0.0<br>(-0.5, 0.4)                            | 0.1<br>(-0.6, 0.6)                            | 0.0<br>(-1.8, 1.9)                            | -0.1<br>(-0.6, 0.3)                         | -0.2<br>(-0.7, 0.3)                         | -0.3<br>(-2.0, 1.9)                         | 0.0<br>(-0.4, 0.6)                           | -0.2<br>(-2.2, 1.9)                          | -0.2<br>(-2.1, 1.7)                          |

Bold values indicate a statistically significant difference for the two-sided Wilcoxon's matched-pairs signed-rank test after performing the Benjamini-Hochberg procedure to correct for multiple comparisons at significance level 0.05. The corresponding p-values are presented in Supplemental Table 5.

**Supplemental Table 5** Statistical analysis.

|                           | Kruskal-Wallis omnibus test | Wilcoxon's matched-pairs signed rank test <sup>a</sup> |                       |                       |                       |                     |                     |                     |                      |                      |                      |
|---------------------------|-----------------------------|--------------------------------------------------------|-----------------------|-----------------------|-----------------------|---------------------|---------------------|---------------------|----------------------|----------------------|----------------------|
|                           |                             | TB2-SL5 vs TB2-SL2.5                                   | HA2-DL10 vs TB2-SL2.5 | HA3-DL10 vs TB2-SL2.5 | ET3-DL10 vs TB2-SL2.5 | HA2-DL10 vs TB2-SL5 | HA3-DL10 vs TB2-SL5 | ET3-DL10 vs TB2-SL5 | HA3-DL10 vs HA2-DL10 | ET3-DL10 vs HA2-DL10 | ET3-DL10 vs HA3-DL10 |
|                           |                             | p-value                                                | p-value               | p-value               | p-value               | p-value             | p-value             | p-value             | p-value              | p-value              | p-value              |
| <b>Target coverage</b>    |                             |                                                        |                       |                       |                       |                     |                     |                     |                      |                      |                      |
| GTV <sub>boost</sub>      |                             |                                                        |                       |                       |                       |                     |                     |                     |                      |                      |                      |
| D <sub>99%</sub> [Gy]     | 0,631                       | -                                                      | -                     | -                     | -                     | -                   | -                   | -                   | -                    | -                    | -                    |
| D <sub>0.1cc</sub> [Gy]   | 0,748                       | -                                                      | -                     | -                     | -                     | -                   | -                   | -                   | -                    | -                    | -                    |
| PTV <sub>prostate</sub>   |                             |                                                        |                       |                       |                       |                     |                     |                     |                      |                      |                      |
| D <sub>99%</sub> [Gy]     | 0,749                       | -                                                      | -                     | -                     | -                     | -                   | -                   | -                   | -                    | -                    | -                    |
| PTV <sub>SV</sub>         |                             |                                                        |                       |                       |                       |                     |                     |                     |                      |                      |                      |
| D <sub>99%</sub> [Gy]     | <b>&lt; 0.001</b>           | <b>0,002</b>                                           | <b>0,002</b>          | 0,735                 | <b>&lt; 0.001</b>     | 0,978               | 0,099               | <b>&lt; 0.001</b>   | <b>0,008</b>         | <b>&lt; 0.001</b>    | <b>&lt; 0.001</b>    |
| <b>Dose spillage</b>      |                             |                                                        |                       |                       |                       |                     |                     |                     |                      |                      |                      |
| CI                        | 0,058                       | -                                                      | -                     | -                     | -                     | -                   | -                   | -                   | -                    | -                    | -                    |
| D2cm [%]                  | <b>&lt; 0.001</b>           | <b>&lt; 0.001</b>                                      | <b>&lt; 0.001</b>     | <b>&lt; 0.001</b>     | <b>&lt; 0.001</b>     | <b>&lt; 0.001</b>   | 0,43                | <b>&lt; 0.001</b>   | <b>&lt; 0.001</b>    | <b>&lt; 0.001</b>    | <b>&lt; 0.001</b>    |
| <b>OAR dose</b>           |                             |                                                        |                       |                       |                       |                     |                     |                     |                      |                      |                      |
| Rectum                    |                             |                                                        |                       |                       |                       |                     |                     |                     |                      |                      |                      |
| D <sub>0.035cc</sub> [Gy] | 0,015                       | -                                                      | -                     | -                     | -                     | -                   | -                   | -                   | -                    | -                    | -                    |
| V <sub>38Gy</sub> [cc]    | <b>0,008</b>                | 0,5                                                    | 0,125                 | 0,125                 | <b>0,002</b>          | 0,125               | 0,125               | <b>0,002</b>        | 0,75                 | <b>0,002</b>         | <b>0,002</b>         |
| V <sub>35Gy</sub> [cc]    | 0,026                       | -                                                      | -                     | -                     | -                     | -                   | -                   | -                   | -                    | -                    | -                    |
| V <sub>32Gy</sub> [%]     | 0,929                       | -                                                      | -                     | -                     | -                     | -                   | -                   | -                   | -                    | -                    | -                    |
| V <sub>28Gy</sub> [%]     | 0,844                       | -                                                      | -                     | -                     | -                     | -                   | -                   | -                   | -                    | -                    | -                    |
| V <sub>23.5Gy</sub> [%]   | 0,823                       | -                                                      | -                     | -                     | -                     | -                   | -                   | -                   | -                    | -                    | -                    |
| V <sub>20.5Gy</sub> [%]   | 0,92                        | -                                                      | -                     | -                     | -                     | -                   | -                   | -                   | -                    | -                    | -                    |

(continued on next page)

**Supplemental Table 5** (continued)

|                              | Kruskal-Wallis<br>omnibus test | Wilcoxon's matched-pairs signed rank test <sup>a</sup> |                             |                             |                             |                           |                           |                           |                            |                            |                            |
|------------------------------|--------------------------------|--------------------------------------------------------|-----------------------------|-----------------------------|-----------------------------|---------------------------|---------------------------|---------------------------|----------------------------|----------------------------|----------------------------|
|                              |                                | TB2-SL5<br>vs<br>TB2-SL2.5                             | HA2-DL10<br>vs<br>TB2-SL2.5 | HA3-DL10<br>vs<br>TB2-SL2.5 | ET3-DL10<br>vs<br>TB2-SL2.5 | HA2-DL10<br>vs<br>TB2-SL5 | HA3-DL10<br>vs<br>TB2-SL5 | ET3-DL10<br>vs<br>TB2-SL5 | HA3-DL10<br>vs<br>HA2-DL10 | ET3-DL10<br>vs<br>HA2-DL10 | ET3-DL10<br>vs<br>HA3-DL10 |
|                              |                                | p-value                                                | p-value                     | p-value                     | p-value                     | p-value                   | p-value                   | p-value                   | p-value                    | p-value                    | p-value                    |
| <b>Rectum</b>                |                                |                                                        |                             |                             |                             |                           |                           |                           |                            |                            |                            |
| V <sub>17Gy</sub> [%]        | 0,913                          | -                                                      | -                           | -                           | -                           | -                         | -                         | -                         | -                          | -                          | -                          |
| <b>PRV<sub>rectum</sub></b>  |                                |                                                        |                             |                             |                             |                           |                           |                           |                            |                            |                            |
| D <sub>0.035cc</sub> [Gy]    | 0,977                          | -                                                      | -                           | -                           | -                           | -                         | -                         | -                         | -                          | -                          | -                          |
| <b>Bladder</b>               |                                |                                                        |                             |                             |                             |                           |                           |                           |                            |                            |                            |
| V <sub>42Gy</sub> [cc]       | 1                              | -                                                      | -                           | -                           | -                           | -                         | -                         | -                         | -                          | -                          | -                          |
| V <sub>37Gy</sub> [cc]       | < 0.001                        | < 0.001                                                | 1                           | 0,749                       | < 0.001                     | 0,003                     | 0,002                     | < 0.001                   | 0,22                       | < 0.001                    | < 0.001                    |
| V <sub>32Gy</sub> [%]        | 0,906                          | -                                                      | -                           | -                           | -                           | -                         | -                         | -                         | -                          | -                          | -                          |
| V <sub>28Gy</sub> [%]        | 0,911                          | -                                                      | -                           | -                           | -                           | -                         | -                         | -                         | -                          | -                          | -                          |
| <b>Urethra</b>               |                                |                                                        |                             |                             |                             |                           |                           |                           |                            |                            |                            |
| D <sub>0.035cc</sub> [Gy]    | 0,001                          | 0,578                                                  | 0,078                       | 0,220                       | < 0.001                     | 0,043                     | 0,121                     | < 0.001                   | 0,492                      | < 0.001                    | < 0.001                    |
| <b>PRV<sub>urethra</sub></b> |                                |                                                        |                             |                             |                             |                           |                           |                           |                            |                            |                            |
| D <sub>0.035cc</sub> [Gy]    | 0,775                          | -                                                      | -                           | -                           | -                           | -                         | -                         | -                         | -                          | -                          | -                          |
| <b>Anal canal</b>            |                                |                                                        |                             |                             |                             |                           |                           |                           |                            |                            |                            |
| V <sub>37.85Gy</sub> [cc]    | 0,089                          | -                                                      | -                           | -                           | -                           | -                         | -                         | -                         | -                          | -                          | -                          |
| V <sub>21.4Gy</sub> [%]      | 0,989                          | -                                                      | -                           | -                           | -                           | -                         | -                         | -                         | -                          | -                          | -                          |
| V <sub>19.2Gy</sub> [%]      | 0,988                          | -                                                      | -                           | -                           | -                           | -                         | -                         | -                         | -                          | -                          | -                          |
| <b>Penile bulb</b>           |                                |                                                        |                             |                             |                             |                           |                           |                           |                            |                            |                            |
| V <sub>20Gy</sub> [%]        | 0,993                          | -                                                      | -                           | -                           | -                           | -                         | -                         | -                         | -                          | -                          | -                          |

(continued on next page)

**Supplemental Table 5** (continued)

|                       | Wilcoxon's matched-pairs signed rank test <sup>a</sup> |                 |                 |                 |                 |               |               |               |                |                |                |
|-----------------------|--------------------------------------------------------|-----------------|-----------------|-----------------|-----------------|---------------|---------------|---------------|----------------|----------------|----------------|
|                       | Kruskal-Wallis<br>omnibus test                         | TB2-SL5         | HA2-DL10        | HA3-DL10        | ET3-DL10        | HA2-DL10      | HA3-DL10      | ET3-DL10      | HA3-DL10       | ET3-DL10       | ET3-DL10       |
|                       |                                                        | vs<br>TB2-SL2.5 | vs<br>TB2-SL2.5 | vs<br>TB2-SL2.5 | vs<br>TB2-SL2.5 | vs<br>TB2-SL5 | vs<br>TB2-SL5 | vs<br>TB2-SL5 | vs<br>HA2-DL10 | vs<br>HA2-DL10 | vs<br>HA3-DL10 |
| p-value               | p-value                                                | p-value         | p-value         | p-value         | p-value         | p-value       | p-value       | p-value       | p-value        | p-value        |                |
| Femoral head & neck   |                                                        |                 |                 |                 |                 |               |               |               |                |                |                |
| V <sub>28Gy</sub> [%] | 1                                                      | -               | -               | -               | -               | -             | -             | -             | -              | -              | -              |
| <b>NTCP</b>           |                                                        |                 |                 |                 |                 |               |               |               |                |                |                |
| Rectum [%]            | 0,341                                                  | -               | -               | -               | -               | -             | -             | -             | -              | -              | -              |
| Bladder [%]           | 0,989                                                  | -               | -               | -               | -               | -             | -             | -             | -              | -              | -              |

Bold values indicate a statistically significant p-value after performing the Benjamini-Hochberg procedure to correct for multiple comparisons at significance level 0.05.

<sup>a</sup> Wilcoxon's matched-pairs signed rank test was only performed for plan quality metrics that showed a statistically significant p-value for the Kruskal-Wallis omnibus test.
