# Supplementary material for: Automated treatment planning of prostate stereotactic body radiotherapy with focal boosting on a fast‐rotating O‐ring linac: Plan quality comparison with C‐arm linacs
Source: PubMed Central journal article supplement (PMC8425873; doi:10.1002/acm2.13345), 2021-07-28
Supplement: ACM2-22-59-s002.pdf [file ACM2-22-59-s002.pdf]

## Supplemental Methods and materials

### Normal tissue complication probability calculation

Normal tissue complication probability (NTCP) for the rectum and bladder were calculated using the Lyman-Kutcher-Burman (LKB) model with Niemierko's equivalent uniform dose [1–3]. Rectum NTCP was calculated using the best estimate QUANTEC parameters for late grade  $\geq 2$  rectal toxicity or bleeding [4]. Bladder NTCP was calculated using the parameters derived by Kole et al. for late urinary symptom flare after prostate SBRT in 5 fractions [5].

First, the cumulative dose volume histograms (DVHs) of the rectum and the bladder were extracted from the treatment planning system and converted into relative volume differential DVHs using an in-house Matlab script (MathWorks, Natick, MA).

For the rectum, DVH dose bins were converted to the equivalent dose in 2 Gy fractions according to,

$$EQD_2 = D \frac{\alpha/\beta + d}{\alpha/\beta + 2}$$

with  $D$  the total dose and  $d$  the dose per fraction. An  $\alpha/\beta$  ratio of 3 Gy was used as recommended by the QUANTEC study and the late rectal toxicity endpoint analysis of the CHHiP trial [4,6].

For the bladder, biological effective dose correction was not necessary as the studied fractionation scheme (5 fractions) was identical to the one used for modelling by Kole et al. [5].

Next, the (corrected) differential DVHs were used to calculate Niemierko's equivalent uniform dose ( $EUD$ ):

$$EUD = \left( \sum_i D_i^{\frac{1}{n}} V_i \right)^n$$

with  $V_i$  the relative differential volume of dose bin  $i$  that receives a dose  $D_i$  and  $n$  the volume effect parameter [3]. The dose  $D_i$  is calculated as the average of the lower and upper dose limit of the dose bin.

The NTCP was then calculated according to:

$$NTCP = \frac{1}{\sqrt{2\pi}} \int_{-\infty}^t e^{-\frac{x^2}{2}} dx$$

with

$$t = \frac{EUD - TD_{50}}{m \cdot TD_{50}}$$

where  $TD_{50}$  is the dose that will result in 50% of complication in a uniformly irradiated tissue and  $m$  is inversely proportional to the slope of the steepest point on the NTCP versus  $EUD$  curve.

The NTCP parameters were  $n = 0.09$ ,  $m = 0.13$  and  $TD_{50} = 76.9$  Gy for the rectum NTCP [4] and  $n = 0.03$ ,  $m = 0.19$  and  $TD_{50} = 38.7$  Gy for the bladder NTCP [5].

## References

1. Lyman JT. Complication Probability as Assessed from Dose-Volume Histograms. *Radiat Res Suppl.* 1985;8:S13–9.
2. Kutcher G, Burman C. Calculation of complication probability factors for non-uniform normal tissue irradiation: the effective volume method. *Int J Radiat Oncol Biol Phys.* 1989;16:1623–30.
3. Niemierko A. Reporting and analyzing dose distributions: A concept of equivalent uniform dose. *Med Phys.* 1997;24(1):103–10.
4. Michalski JM, Gay H, Jackson A, Tucker SL, Deasy JO. Radiation Dose-Volume Effects in Radiation-Induced Rectal Injury. *Int J Radiat Oncol Biol Phys.* 2010;76(3 SUPPL.):123–9.
5. Kole TP, Tong M, Wu B, Lei S, Obayomi-Davies O, Chen LN, et al. Late urinary toxicity modeling after stereotactic body radiotherapy (SBRT) in the definitive treatment of localized prostate cancer. *Acta Oncol (Madr).* 2016;55(1):52–8.
6. Brand DH, Brüningk SC, Wilkins A, Fernandez K, Naismith O, Gao A, et al. Estimates of Alpha/Beta ( $\alpha/\beta$ ) Ratios for Individual Late Rectal Toxicity Endpoints: An Analysis of the CHHiP trial. *Int J Radiat Oncol Biol Phys.* 2021;
